# Supplementary material
Source: HighWire-hosted journal article supplement (https://bjo.bmj.com/content/104/2/241)
Supplement: inline-supplementary-material-1 [file inline-supplementary-material-1.pdf]

Supplementary Table 1. Baseline information of all patients.

|                                                  | (n = 40)               |
|--------------------------------------------------|------------------------|
| Sex (male:female)                                | 26:14                  |
| Average age at the starting point                | 42.8±14.7              |
| Visual acuity at the starting point (logMAR)     | 0.95±0.93              |
| Rate of p.Gln118Ter mutation and other mutations | 22:6 (12 were unknown) |
