# Supplementary material
Source: HighWire-hosted journal article supplement (https://bjo.bmj.com/content/104/2/241)
Supplement: inline-supplementary-material-2 [file inline-supplementary-material-2.pdf]

Supplementary Table 2. The detail of properties of SCL products used in this study

|                                                                                                   |                            |                                                   |                            |                                   |                             |                            |
|---------------------------------------------------------------------------------------------------|----------------------------|---------------------------------------------------|----------------------------|-----------------------------------|-----------------------------|----------------------------|
| Name(Japan)                                                                                       | Plano T®                   | Breath-O®                                         | Plano B4®                  | Acuvue®                           | AIR OPTIX® EX AQUA          | Medalist® plus             |
| Name(USA)                                                                                         | Plano T Therapeutic®       | (launched only in Japan)                          | B4®                        | Acuvue®                           | AIR OPTIX® Focus NIGHT&DAY® | See Quence 2®              |
| Manufacturer                                                                                      | BAUSCH +LOMB Ireland, Ltd. | TORAY Industries Inc.                             | BAUSCH +LOMB Ireland, Ltd. | Johnson&Johnson Vision Care, Inc. | Alcon Inc.                  | BAUSCH +LOMB Ireland, Ltd. |
| Classification                                                                                    | hydrogel                   | hydrogel                                          | hydrogel                   | hydrogel                          | Silicone hydrogel           | hydrogel                   |
| Material                                                                                          | polymacon (Poly-HEMA)      | (unclear)                                         | polymacon (Poly-HEMA)      | etafilcon A                       | lotrafilcon A               | polymacon (Poly-HEMA)      |
| Polymer                                                                                           | HEMA                       | vinyl pyrrolidone<br>+methyl methacrylate polymer | HEMA                       | HEMA+MAA                          | DMA+TRIS+siloxane macromer  | 2-HEMA                     |
| Food and Drug Administration (FDA) classification                                                 | I                          | II                                                | I                          | IV                                | I                           | I                          |
| Water content (%)                                                                                 | 38.6                       | 78                                                | 38.6                       | 58                                | 24                          | 38.6                       |
| Base Curve (mm)                                                                                   | 8.14                       | 7.8/8.1/8.4/8.7                                   | 8.9                        | 8.4/8.8/9.1                       | 8.4/8.6                     | 8.7                        |
| Diameter (mm)                                                                                     | 14.7                       | 13.5                                              | 14.5                       | 14.0/14.4                         | 13.8                        | 14.0                       |
| Center Thickness (mm)                                                                             | 0.18 (-3.0D)               | 0.6(+15.0D)                                       | 0.12 (-3.0D)               | 0.07 (-3.0D)/0.15 (+2.0D)         | 0.08 (-3.0D)                | 0.038 (-3.0D)              |
| Dk ( $\times 10^{-11}$ )( $\text{cm}^2/\text{sec}$ )( $\text{mLO}_2/\text{mL}\times\text{mmHg}$ ) | 9.5                        | 64                                                | 9.5                        | 28                                | 140                         | 9.5                        |
| Method of manufacture                                                                             | Spincast                   | Cast Molding                                      | Spincast                   | Stabilized Soft Molding           | Cast Molding                | Reverse process III        |
| Sales in Japan (launch~discontinuation)                                                           | from Jan/1975 to Dec/1997  | Aug/1981- ongoing                                 | from Jan/1982 to Nov/2010  | from Oct/1991 to Jul/2016         | Oct/2004- ongoing           | Nov/2010- ongoing          |

HEMA: 2-hydroxymethyl methacrylate; MAA: methacrylic acid; DMA: N,N-dimethylacrylamide, TRIS: trimethyl siloxysilyl; FDA: Food and Drug Administration

SCLs were introduced to treatment at the discretion of the treating doctor and were replaced aseptically with a lid-opener, on a monthly basis at our clinic, by the attending ophthalmologist.
