# Supplementary material
Source: HighWire-hosted journal article supplement (https://bjo.bmj.com/content/104/2/241)
Supplement: inline-supplementary-material-3 [file inline-supplementary-material-3.pdf]

|        |   | After              |                    |                    |                |
|--------|---|--------------------|--------------------|--------------------|----------------|
|        |   | 0                  | 1                  | 2                  | 3              |
| Before | 0 | progress restraint | aggravation        | aggravation        | aggravation    |
|        | 1 | improvement        | progress restraint | aggravation        | aggravation    |
|        | 2 | improvement        | improvement        | progress restraint | aggravation    |
|        | 3 | improvement        | improvement        | improvement        | not applicable |
|        |   |                    |                    |                    |                |
