# Supplementary material
Source: HighWire-hosted journal article supplement (https://bjo.bmj.com/content/104/2/241)
Supplement: inline-supplementary-material-4 [file inline-supplementary-material-4.pdf]

Supplementary Table 4. Baseline information of patients in the third analysis, SCL effects on surgical interventions.

|                                                  | SCL-on (n = 16)                                                                                         | SCL-off (n = 22)                                                                  |               |
|--------------------------------------------------|---------------------------------------------------------------------------------------------------------|-----------------------------------------------------------------------------------|---------------|
| Sex (male:female)                                | 11:5                                                                                                    | 13:9                                                                              | $P = 0.735^a$ |
| Average age at the starting point                | 44.9±13.5                                                                                               | 41.4±15.6                                                                         | $P = 0.475^b$ |
| Visual acuity at the starting point (logMAR)     | 1.00±0.74                                                                                               | 1.13±1.05                                                                         | $P = 0.682^b$ |
| Rate of p.Gln118Ter mutation and other mutations | 10:6<br>(Among the 6 eyes, 2 eyes had p.Gln211ArgfsTer, 60, 2 eyes had p.Ile156Asn, and 2 were unknown) | 11:11<br>(Among the 11 eyes, 2 eyes had p.Gln211ArgfsTer, 60, and 9 were unknown) | $P = 0.521^a$ |

a: Fisher's exact test, b: *t*-test,

Patients and the clinical features in the third analysis, which included all 40 eyes of the 20 patients, except for 2 eyes excluded due to absence of sufficient clinical examinations. The patient population included 16 eyes in SCL-on and 22 eyes in SCL-off groups. Deleterious mutations in *TACSTD2* in both alleles were detected in 27 eyes; for the remaining eyes, mutation analyses were not performed.
