# Supplementary material
Source: HighWire-hosted journal article supplement (https://bjo.bmj.com/content/104/2/241)
Supplement: inline-supplementary-material-8 [file inline-supplementary-material-8.pdf]

Supplementary Table 5. Average and median time until surgical intervention for SCL-on and SCL-off groups, additionally excluding cases in which surgery was decided and scheduled on the first clinic visit

|                                                                                                     | SCL-on  |                | SCL-off |                |
|-----------------------------------------------------------------------------------------------------|---------|----------------|---------|----------------|
| Time of monitoring period<br>(eyes without surgical interventions during observation)               |         | 10 eyes        |         | 2 eyes         |
|                                                                                                     | average | 3745±1736 days | average | 748 days       |
|                                                                                                     | median  | 3730 days      | median  | 748 days       |
| Time until surgical intervention<br>(eyes with surgical interventions during the monitoring period) |         | 6 eyes         |         | 15 eyes        |
|                                                                                                     | average | 1146±740 days  | average | 1818±1352 days |
|                                                                                                     | median  | 1096 days      | median  | 1799 days      |
| Total                                                                                               |         | 16 eyes        |         | 17 eyes        |
|                                                                                                     | average | 2770±1918 days | average | 1692±1314 days |
|                                                                                                     | median  | 2522 days      | median  | 1507 days      |

Average and median time until surgical intervention for SCL-on and SCL-off in the additional analysis, with five cases from SCL-off group for which surgeries were decided and scheduled on their first clinic visit additionally excluded. The patient population included 16 eyes in SCL-on and 17 eyes in SCL-off groups. The time until surgical intervention for 16 SCL-on eyes was still significantly longer than that of 17 SCL-off eyes.
