# Supplementary material
Source: HighWire-hosted journal article supplement (https://bjo.bmj.com/content/104/2/241)
Supplement: inline-supplementary-material-9 [file inline-supplementary-material-9.pdf]

Supplementary Table 3. Baseline information of patients in the first and second analyses

|                                              | SCL-on (n = 11)                                                                               | SCL-off (n = 6)                                                        |               |
|----------------------------------------------|-----------------------------------------------------------------------------------------------|------------------------------------------------------------------------|---------------|
| Sex (male:female)                            | 7:4                                                                                           | 3:3                                                                    | $P = 0.644^a$ |
| Average age at the starting point            | 46.0±12.5                                                                                     | 51.0±11.7                                                              | $P = 0.435^b$ |
| Visual acuity at the starting point (logMAR) | 0.98±0.74                                                                                     | 1.37±1.01                                                              | $P = 0.371^b$ |
| Rate of p.Gln118Ter mutation                 | 6:5<br>(Among the 5 eyes, 1 eye of p.Gln211ArgfsTer60, 2 eyes of p.Ile156Asn, 2 eyes unknown) | 2:4<br>(Among the 4 eyes, 1 eye of p.Gln211ArgfsTer60, 3 eyes unknown) | $P = 0.620^a$ |

(a: Fisher's exact test    b: Student's *t*-test)
